# Supplementary material for: Two novel octamolybdate-based frameworks decorated by flexible bis-pyridyl-bis-amide ligands with different spacer lengths
Source: Royal Society of Chemistry journal article supplement (doi:10.1039/c2ra22855f), 2012-12-22
Supplement: c2ra22855f.pdf [file c2ra22855f.pdf]

Supplementary Material (ESI) for RSC Advances  
This journal is © The Royal Society of Chemistry

## Two novel octamolybdate-based frameworks decorated by flexible bis-pyridyl-bis-amide ligands with different spacer lengths

Xiuli Wang,\* Chuang Xu, Hongyan Lin, Guocheng Liu, Jian Luan and Zhihan Chang

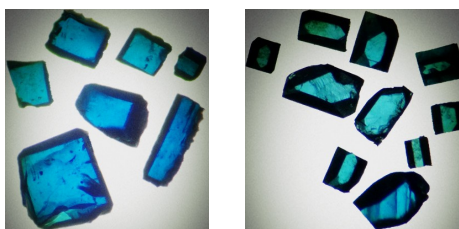

Fig. S1 Crystal photo of compounds 1 and 2.

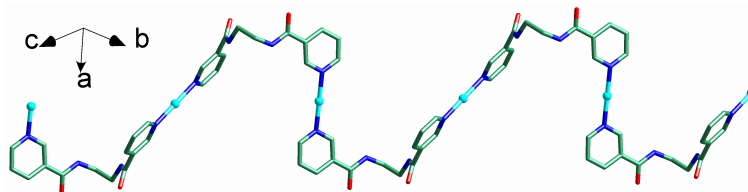

Fig. S2 The 1D chain formed by ligand L<sub>1</sub> and the Cu<sup>II</sup> ions in 1.

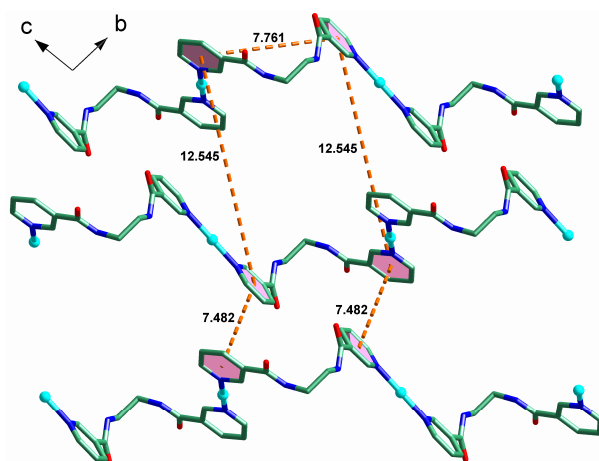

Fig. S3 The adjacent 1D chains are stagger-peaked with each other to form different cavities.

Supplementary Material (ESI) for RSC Advances  
This journal is © The Royal Society of Chemistry

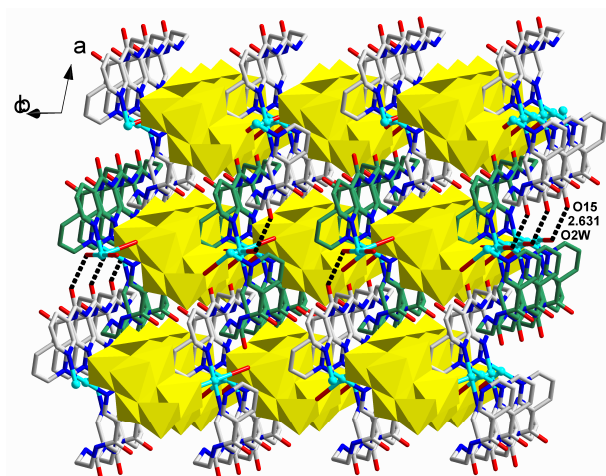

Fig. S4 The 3D supramolecular structure of compound 1.

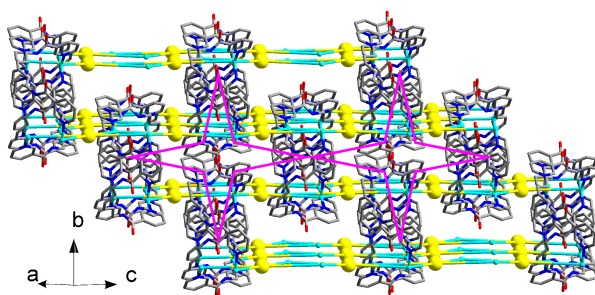

Fig. S5 The 3D framework of 2. The yellow ball represents the Mo<sub>8</sub> polyoxanion.

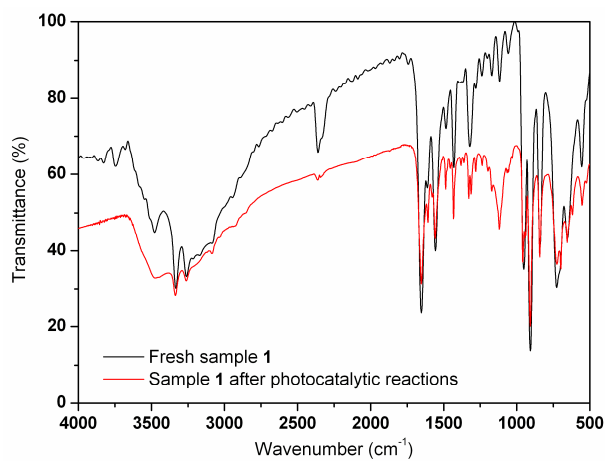

**Supplementary Material (ESI) for RSC Advances**  
**This journal is © The Royal Society of Chemistry**

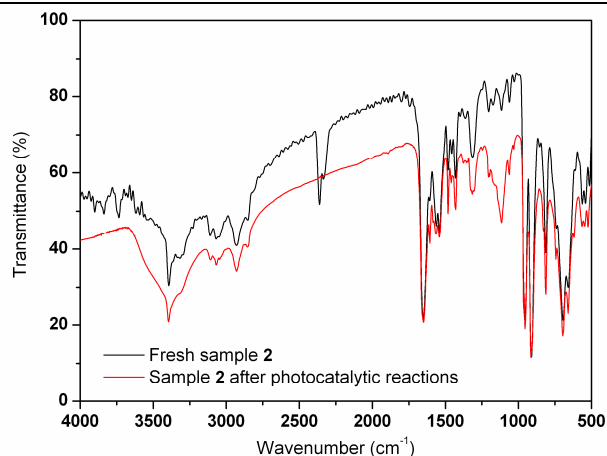

**Fig. S6** IR spectra of samples 1 and 2 before and after photocatalytic reactions.

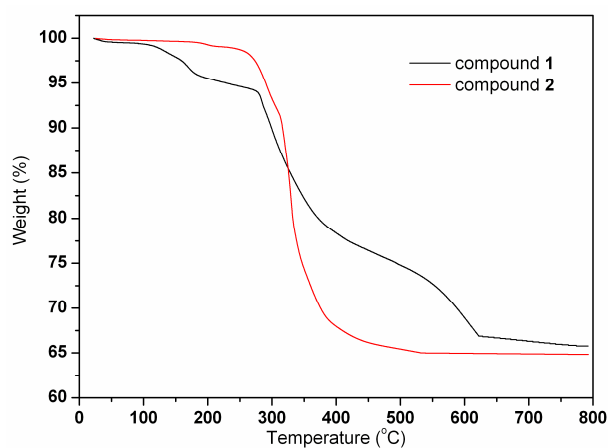

**Fig. S7** The TG curves of compounds 1 and 2.

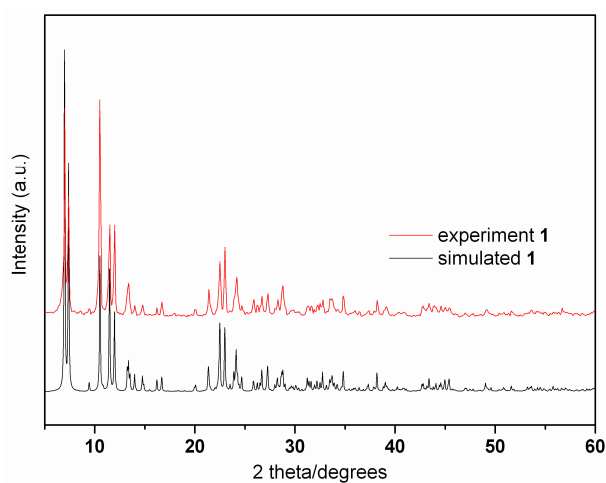

Supplementary Material (ESI) for RSC Advances  
This journal is © The Royal Society of Chemistry

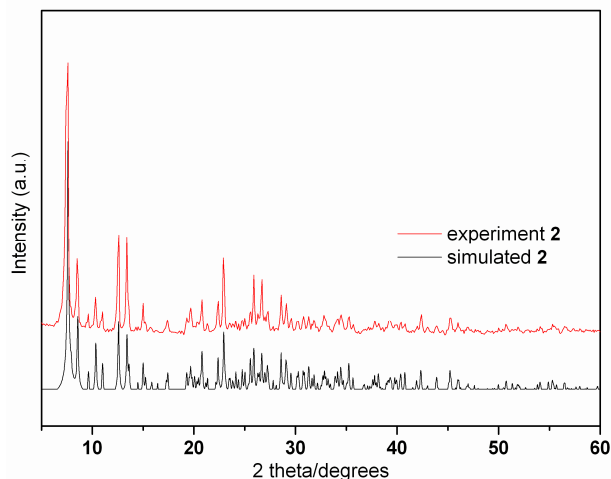

**Figure S8** The simulated (black line) and experimental (red line) powder X-ray diffraction patterns for compounds **1** and **2**. The diffraction peaks of both simulated and experimental patterns match well in positions, thus indicating that the phase purities of the compounds **1** and **2** are well.

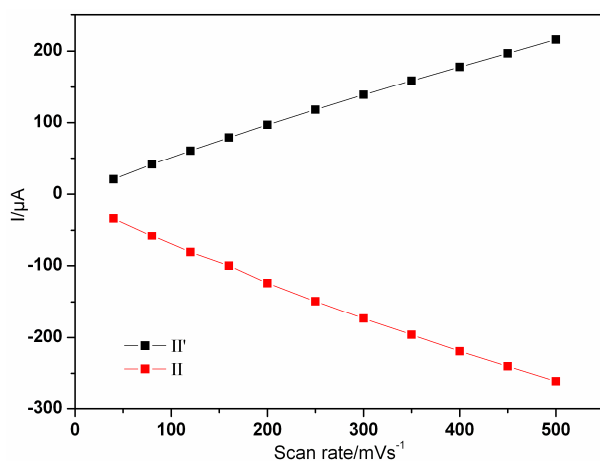

**Fig. S9** The dependence of cathodic peak and anodic peak currents on scan rates of **1**-CPE.

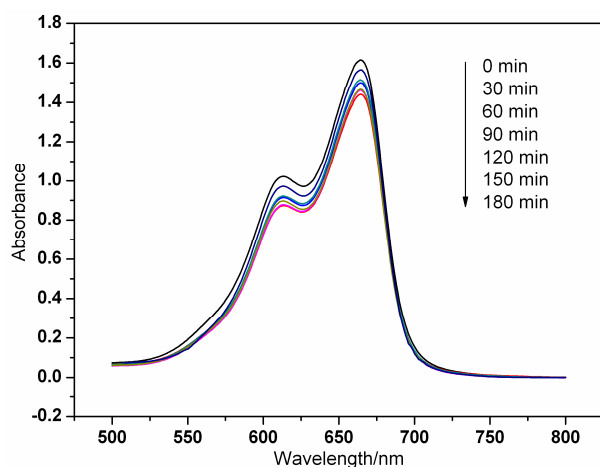

**Fig. S10** Changes in the absorption spectra of the MB solution during the decomposition reaction under UV light irradiation without title compounds.

**Supplementary Material (ESI) for RSC Advances**  
**This journal is © The Royal Society of Chemistry**

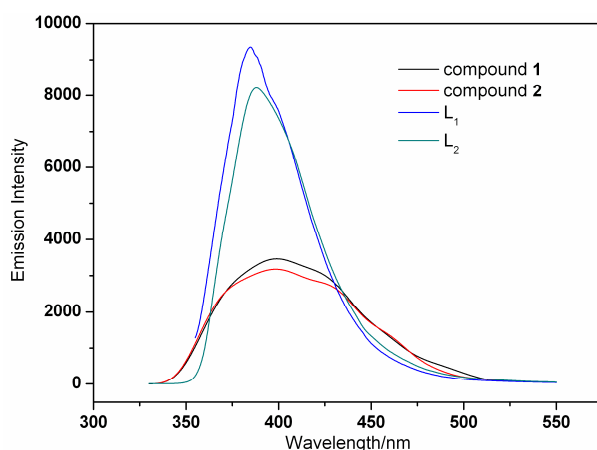

**Fig. S11** Luminescence spectra of compounds **1**, **2** and the free  $L_1$ ,  $L_2$  ligands.

**Table S1** Selected bond distances (Å) and angles (°) for compounds **1** and **2**.

| Compound 1                                                                                                          |           |                     |           |
|---------------------------------------------------------------------------------------------------------------------|-----------|---------------------|-----------|
| Cu(1)–O(1W)                                                                                                         | 2.013(3)  | Cu(1)–O(1W)#1       | 2.013(3)  |
| Cu(1)–N(1)#1                                                                                                        | 2.017(3)  | Cu(1)–N(1)          | 2.017(3)  |
| Cu(1)–O(10)#1                                                                                                       | 2.364(3)  | Cu(1)–O(10)         | 2.364(3)  |
| Cu(2)–O(2W)                                                                                                         | 1.928(2)  | Cu(2)–O(2W)#2       | 1.928(2)  |
| Cu(2)–N(4)#2                                                                                                        | 2.016(3)  | Cu(2)–N(4)          | 2.016(3)  |
| Cu(2)–O(9)#4                                                                                                        | 2.601(2)  | Cu(2)–O(9)#3        | 2.601(2)  |
| O(1W)–Cu(1)–O(1W)#1                                                                                                 | 180.0     | O(1W)–Cu(1)–N(1)#1  | 88.56(11) |
| O(1W)#1–Cu(1)–N(1)#1                                                                                                | 91.44(11) | O(1W)–Cu(1)–N(1)    | 91.44(11) |
| O(1W)#1–Cu(1)–N(1)                                                                                                  | 88.56(11) | N(1)#1–Cu(1)–N(1)   | 180.0     |
| O(1W)–Cu(1)–O(10)#1                                                                                                 | 91.17(11) | O(1W)–Cu(1)–O(10)   | 88.83(11) |
| O(1W)#1–Cu(1)–O(10)#1                                                                                               | 88.83(11) | O(1W)#1–Cu(1)–O(10) | 91.17(11) |
| N(1)#1–Cu(1)–O(10)#1                                                                                                | 88.85(11) | N(1)#1–Cu(1)–O(10)  | 91.15(11) |
| N(1)–Cu(1)–O(10)#1                                                                                                  | 91.15(11) | N(1)–Cu(1)–O(10)    | 88.85(11) |
| O(10)#1–Cu(1)–O(10)                                                                                                 | 180       | O(2W)–Cu(2)–N(4)    | 88.78(10) |
| O(2W)–Cu(2)–O(2W)#2                                                                                                 | 180       | O(2W)#2–Cu(2)–N(4)  | 91.22(10) |
| O(2W)–Cu(2)–N(4)#2                                                                                                  | 91.22(10) | N(4)#2–Cu(2)–N(4)   | 180       |
| O(2W)#2–Cu(2)–N(4)#2                                                                                                | 88.78(10) | O(9)#3–Cu(2)–N(4)   | 93.61(11) |
| O(9)#3–Cu(2)–O(2W)#2                                                                                                | 92.80(11) | O(9)#3–Cu(2)–N(4)#2 | 86.39(11) |
| O(9)#3–Cu(2)–O9                                                                                                     | 180       | O(9)#3–Cu(2)–O2W    | 87.12(11) |
| O(9)#4–Cu(2)–N(4)#2                                                                                                 | 93.61(11) | O(9)#4–Cu(2)–O(2W)  | 92.80(11) |
| O(9)#4–Cu(2)–O2W#2                                                                                                  | 87.12(11) | O(9)#4–Cu(2)–N(4)   | 86.39(11) |
| Symmetry code for <b>1</b> : #1 $-x, -y + 1, -z - 2$ ; #2 $-x, -y, -z - 1$ ; #3 $x, y, 1 + z$ ; #4 $-x, -y, -z - z$ |           |                     |           |
| Compound 2                                                                                                          |           |                     |           |
| Cu(1)–O(1W)                                                                                                         | 1.948(3)  | Cu(1)–N(4)#2        | 2.013(3)  |
| Cu(1)–O(12)#1                                                                                                       | 1.950(3)  | Cu(1)–O(8)          | 2.418(3)  |
| Cu(1)–N(1)                                                                                                          | 1.984(3)  | Cu(1)–O(10)#1       | 2.620(3)  |
| O(1W)–Cu(1)–O(12)#1                                                                                                 | 89.88(11) | N(1)–Cu(1)–N(4)#2   | 93.55(14) |

**Supplementary Material (ESI) for RSC Advances**  
**This journal is © The Royal Society of Chemistry**

|                       |            |                     |           |
|-----------------------|------------|---------------------|-----------|
| O(1W)–Cu(1)–N(1)      | 91.12(13)  | O(1W)–Cu(1)–O(8)    | 89.01(11) |
| O(12)#1–Cu(1)–N(1)    | 175.57(13) | O(12)#1–Cu(1)–O(8)  | 92.90(10) |
| O(1W)–Cu(1)–N(4)#2    | 175.31(13) | N(1)–Cu(1)–O(8)     | 91.43(12) |
| O(12)#1–Cu(1)–N(4)#2  | 85.43(12)  | N(4)#2–Cu(1)–O(8)   | 91.33(13) |
| O(12)#1–Cu(1)–O(10)#1 | 82.32(10)  | O(1W)–Cu(1)–O(10)#1 | 79.58(10) |
| O(10)#1–Cu(1)–O(8)    | 167.58(10) | O(10)#1–Cu(1)–N(1)  | 93.62(12) |
| O(10)#1–Cu(1)–N(4)    | 99.66(13)  |                     |           |

Symmetry code for **2**: #1  $-x - 1, y, -z - 3/2$ ; #2  $x - 1/2, -y + 1/2, z - 1/2$

**Table S2** Ligand conformations and corresponding angles for L<sub>1</sub> and L<sub>2</sub>.

| Compound | diagram                                                                             | Torsion angle/°                                                                                                                                                       | Conformation          | Dihedral angle/°                                        |
|----------|-------------------------------------------------------------------------------------|-----------------------------------------------------------------------------------------------------------------------------------------------------------------------|-----------------------|---------------------------------------------------------|
| 1        | 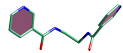   | 88.63 (C7 C8 N3 C9), 63.40 (N2 C7 C8 N3), - 132.04 (C6 N2 C7 C8),                                                                                                     | GGA <i>cis</i>        | 46.14                                                   |
|          |                                                                                     |                                                                                                                                                                       |                       | Plane 1: N1 C1 C2 C3<br>Plane 2: N4 C11 C10 C14 C13 C12 |
| 2        |  | - 94.06 (C13 N3 C12 C11), 175.56 (N3 C12 C11 C10), 162.49 (C12 C11 C10 C9), 22.55 (C11 C10 C9 C8), 169.43 (C10 C9 C8 C7), 177.77 (C9 C8 C7 N2), 103.07 (C8 C7 N2 C6), | AAAGAAA<br><i>cis</i> | 59.30                                                   |
|          |                                                                                     |                                                                                                                                                                       |                       | Plane 1: N1 C1 C2 C3<br>Plane 2: N4 C15 C14 C18 C17 C16 |

**Table S3** Selected hydrogen-bonding geometry (Å, °) for compound **1**.

| D–H···A                | D–H  | H···A | D···A    | D–H···A |
|------------------------|------|-------|----------|---------|
| O(2W)–H(2WA)···O(15)#5 | 0.85 | 1.79  | 2.631(4) | 170     |

Symmetry code for **1**: #1  $x - 1, y, z$
